# Supplementary material for: Theoretical study of the electronically excited radical cations of naphthalene and anthracene as archetypal models for astrophysical observations. Part II. Dynamics consequences
Source: Royal Society of Chemistry journal article supplement (doi:10.1039/c1cp21084j), 2011-01-01
Supplement: c1cp21084j.pdf [file c1cp21084j.pdf]

**Supporting Information**

Theoretical study of electronically excited radical cations of naphthalene and anthracene as archetypical models for astrophysical observations. II. Dynamical consequences

S. Ghanta, V. Sivaranjana Reddy and S. Mahapatra

E-mail: smsc@uohyd.ernet.in, Fax: +91-40-23011357;23012460

School of Chemistry, University of Hyderabad, Hyderabad 500 046, India

**This PDF file includes**

**Table S1**

TABLE S1: *Ab initio* calculated geometry parameters of the electronic ground state of An<sup>+</sup> optimized at the UMP2/cc-pVDZ level of theory.

| Parameter                                         | Value   |
|---------------------------------------------------|---------|
| <u>Bond length (Å)</u>                            |         |
| C <sub>1</sub> - C <sub>2</sub>                   | 1.3958  |
| C <sub>1</sub> - C <sub>6</sub>                   | 1.4185  |
| C <sub>2</sub> - C <sub>3</sub>                   | 1.4235  |
| C <sub>3</sub> - C <sub>4</sub>                   | 1.4375  |
| C <sub>3</sub> - C <sub>7</sub>                   | 1.4165  |
| C <sub>1</sub> - H <sub>17</sub>                  | 1.0944  |
| C <sub>2</sub> - H <sub>18</sub>                  | 1.0956  |
| C <sub>7</sub> - H <sub>16</sub>                  | 1.0976  |
| <u>Bond Angle (deg)</u>                           |         |
| C <sub>1</sub> - C <sub>2</sub> - C <sub>3</sub>  | 120.148 |
| C <sub>2</sub> - C <sub>3</sub> - C <sub>4</sub>  | 119.380 |
| C <sub>2</sub> - C <sub>3</sub> - C <sub>7</sub>  | 121.437 |
| C <sub>2</sub> - C <sub>1</sub> - C <sub>6</sub>  | 120.472 |
| C <sub>5</sub> - C <sub>6</sub> - C <sub>1</sub>  | 120.472 |
| C <sub>3</sub> - C <sub>7</sub> - C <sub>10</sub> | 121.634 |
| C <sub>7</sub> - C <sub>10</sub> - C <sub>9</sub> | 119.183 |
| C <sub>7</sub> - C <sub>3</sub> - C <sub>4</sub>  | 119.183 |
| H <sub>17</sub> - C <sub>2</sub> - C <sub>3</sub> | 119.831 |
| H <sub>17</sub> - C <sub>2</sub> - C <sub>3</sub> | 119.697 |
| H <sub>18</sub> - C <sub>2</sub> - C <sub>3</sub> | 119.284 |
| H <sub>18</sub> - C <sub>2</sub> - C <sub>3</sub> | 120.568 |
| H <sub>16</sub> - C <sub>7</sub> - C <sub>3</sub> | 119.183 |
